# Supplementary material for: Upregulation of Robo4 expression by SMAD signaling suppresses vascular permeability and mortality in endotoxemia and COVID-19 models
Source: PubMed Central journal article supplement — Proc Natl Acad Sci U S A. 2023 Jan 12;120(3):e2213317120. doi: 10.1073/pnas.2213317120 (PMC9934020; doi:10.1073/pnas.2213317120), 2023-01-12
Supplement: pnas.2213317120.sapp.pdf [file pnas.2213317120.sapp.pdf]

## Supporting information

### Upregulation of Robo4 expression by SMAD signaling suppresses vascular permeability and mortality in endotoxemia and COVID-19 models

Maaya Morita<sup>1</sup>, Aki Yoneda<sup>1</sup>, Nagisa Tokunoh<sup>2,3</sup>, Tatsumi Masaki<sup>1</sup>, Keisuke Shirakura<sup>1</sup>, Mayumi Kinoshita<sup>1</sup>, Rina Hashimoto<sup>4</sup>, Naoya Shigesada<sup>1</sup>, Junya Takahashi<sup>1</sup>, Masashi Tachibana<sup>1</sup>, Shota Tanaka<sup>1</sup>, Masanori Obana<sup>1,5</sup>, Nobumasa Hino<sup>1</sup>, Masahito Ikawa<sup>1,2,5</sup>, Kazutake Tsujikawa<sup>1</sup>, Chikako Ono<sup>2,5</sup>, Yoshiharu Matsuura<sup>2,5</sup>, Hiroyasu Kidoya<sup>6</sup>, Nobuyuki Takakura<sup>2,5</sup>, Yoshiaki Kubota<sup>7</sup>, Takefumi Doi<sup>1</sup>, Kazuo Takayama<sup>4</sup>, Yasuo Yoshioka<sup>1,2,3,5</sup>, Yasushi Fujio<sup>1,5</sup>, Yoshiaki Okada<sup>1,5\*</sup>

<sup>1</sup>Graduate School of Pharmaceutical Sciences, Osaka University, Osaka 565-0871, Japan

<sup>2</sup>Research Institute for Microbial Diseases, Osaka University, Osaka 565-0871, Japan

<sup>3</sup>BIKEN Center for Innovative Vaccine Research and Development, The Research Foundation for Microbial Diseases of Osaka University, Osaka 565-0871, Japan

<sup>4</sup>Center for iPS Cell Research and Application (CiRA), Kyoto University, Kyoto 606-8507, Japan

<sup>5</sup>Center for Infectious Disease Education and Research (CiDER), Osaka University, Osaka 565-0871, Japan

<sup>6</sup>Department of Integrative Vascular Biology, Faculty of Medical Sciences, University of Fukui, 23-3 Matsuoka-Shimoaizuki, Eiheiiji, Yoshida, Fukui 910-1193, Japan.

<sup>7</sup>Department of Anatomy, Keio University School of Medicine, Tokyo 160-8582, Japan.

\*Correspondence to: **Yoshiaki Okada**, Ph.D., Graduate School of Pharmaceutical Sciences, Osaka University, 1-6 Yamadaoka, Suita, Osaka 565-0871, Japan

Email: okadabos@phs.osaka-u.ac.jp

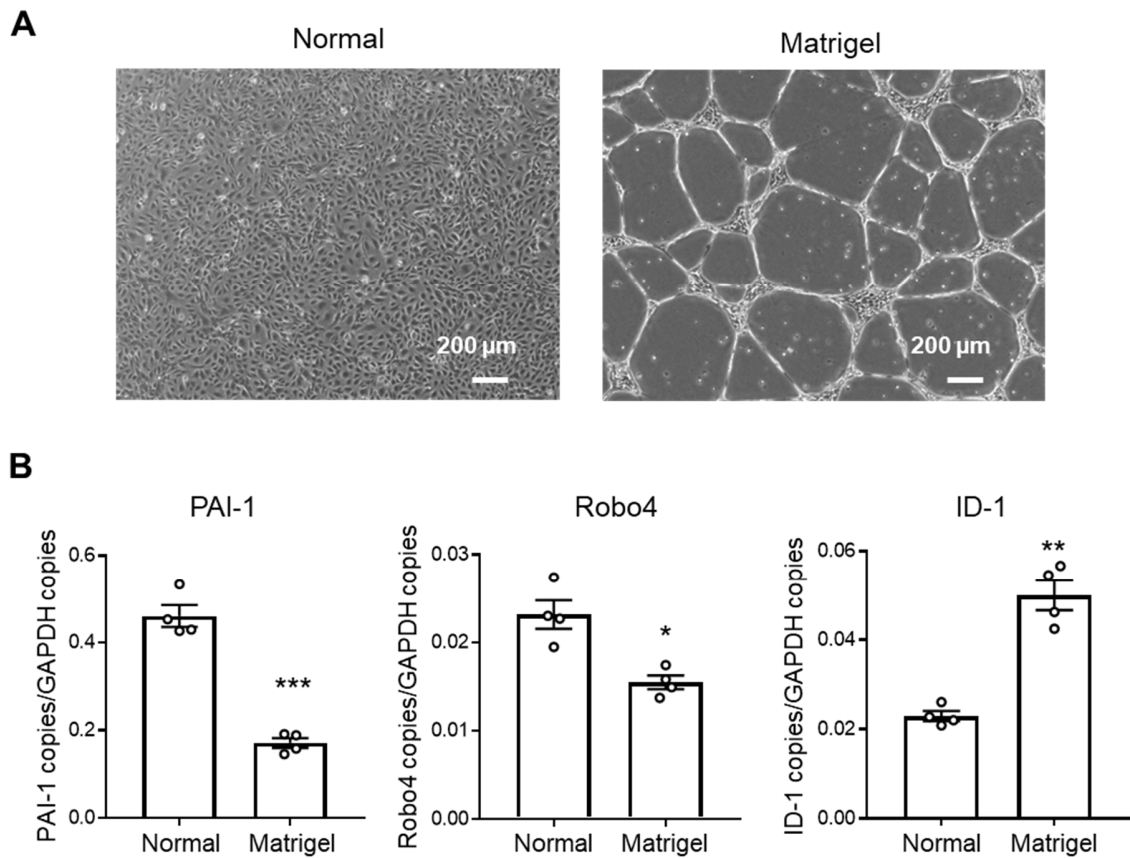

**Figure S1. Culture condition-dependent expression levels of PAI-1, ID-1, and Robo4 in endothelial cells**

(A) HUVECs cultured in the presence or absence of Matrigel. Pictures are representative images of HUVECs cultured in normal or Matrigel conditions. Scale bar = 200  $\mu\text{m}$ . (B) Effect of Matrigel culture on PAI-1, Robo4, and ID-1 expression. HUVECs were cultured in the presence or absence of Matrigel for 24 h, and PAI-1, ID-1, and Robo4 expression was measured by qPCR ( $n = 4$ ,  $*p < 0.05$ ,  $**p < 0.01$ , by the unpaired  $t$ -test). Data are expressed as the mean  $\pm$  standard error of the mean.

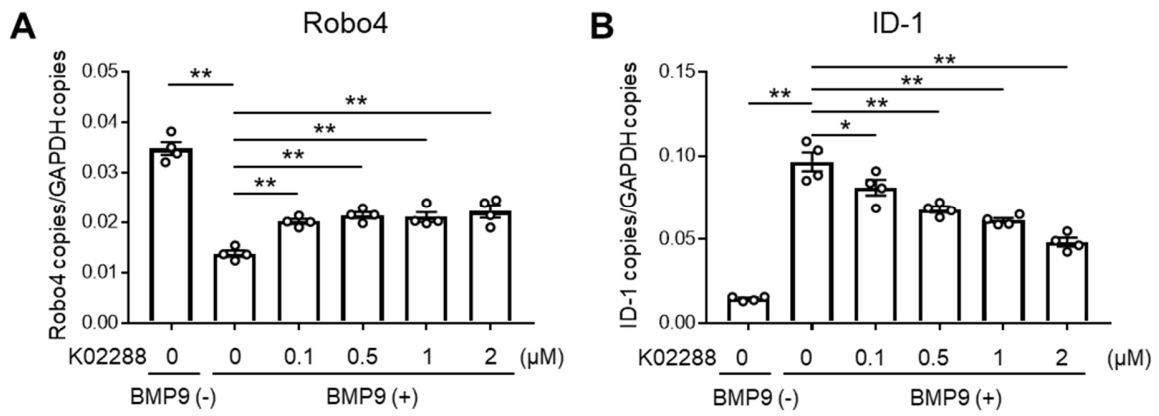

**Figure S2. Expression levels of Robo4 and ID-1 in endothelial cells treated with K02288 and BMP9.** HUVECs were treated with K02288 (0.1 to 2  $\mu$ M) for 30 min followed by BMP9 (1 ng/mL). Expression levels of Robo4 (A) and ID-1 (B) were measured by qPCR (n = 4, \* $p$  < 0.05, \*\* $p$  < 0.01 by Tukey's test). Data are expressed as the mean  $\pm$  standard error of the mean.

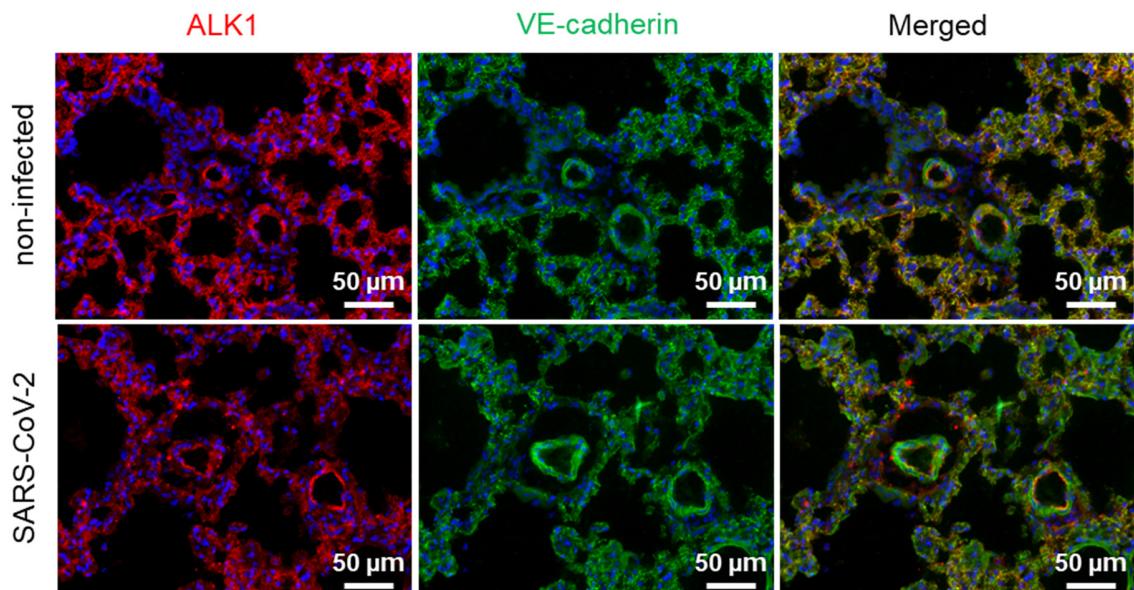

**Figure S3. Expression of ALK1 in mouse lung endothelial cells.** Immunofluorescent staining for ALK1 and VE-cadherin using mouse lungs infected with or without SARS-CoV-2.

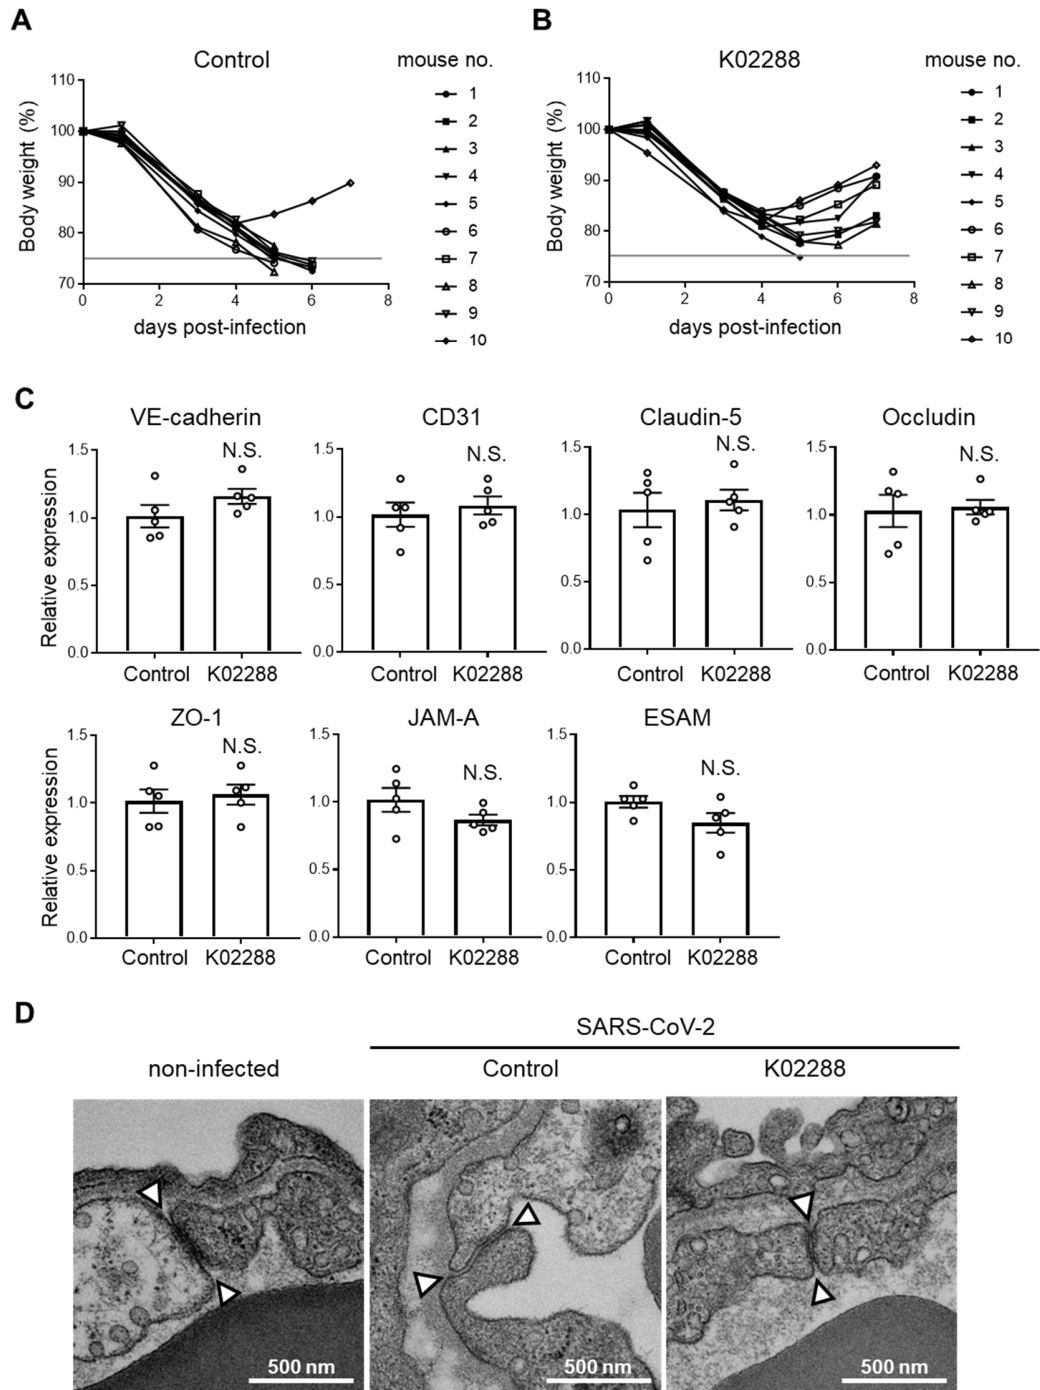

**Figure S4. K02288 suppressed body weight loss in SARS-CoV-2-infected mice.**  
 (A, B) BALB/c mice were intranasally inoculated with SARS-CoV-2, and intraperitoneally

injected with vehicle or K02288 (2 mg/kg body weight) in PBS containing 1% DMSO. Body weights of control mice (n = 10) (A) and K02288-injected mice (n = 10) (B) were measured. The humane endpoint was set at 25% body weight loss relative to initial body weight at the time of infection. (C) Expression levels of junction-related genes in SARS-CoV-2 infected mouse lungs with or without K02288 treatment. Four days after the SARS-CoV-2 infection, lungs were harvested from mice with or without K02288 treatment and used for RNA preparation. Expression levels of junction-related genes were measured by qPCR (n = 5, N.S., not significant by the unpaired *t*-test). (D) Transmission electron microscope (TEM) images of endothelial junctions between in mouse lungs treated with or without SARS-CoV-2 and K02288. Arrowheads indicate the junctions between endothelial cells.

**Table S1. Primers used in this study.**

| <b>Generation of screening cells</b> |    | <b>5'-3'</b>                       |
|--------------------------------------|----|------------------------------------|
| Infusion primers                     | Fw | GTA CTTGGAGCGGCCCTTTCGTCTTCACTCGAG |
|                                      | Rv | TATTTTATTGCGGCCCACTGATAGGGAGTGGTAA |
| <b>qPCR primers</b>                  |    | <b>5'-3'</b>                       |
| human Robo4                          | Fw | TTATGGCTCCCTCATCGCTG               |
|                                      | Rv | GAGGCTGTCTGAGCTGGAAC               |
| human PAI-1                          | Fw | GAAGATCGAGGTGAACGAGAGTG            |
|                                      | Rv | ACCACAAAGAGGAAGGGTCTGT             |
| human ID-1                           | Fw | CTCCA ACTGAAGGTCCCTGATGTAG         |
|                                      | Rv | CGACATGAACGGCTGTTACTCAC            |
| human GAPDH                          | Fw | TGCACCACCAACTGCTTAGC               |
|                                      | Rv | GGCATGGACTGTGGTCATGAG              |
| mouse Robo4                          | Fw | CTAACAGCTCCCCACTGCTC               |
|                                      | Rv | CTGGGCTTTGAGAAAGGTTC               |
| mouse ALK1                           | Fw | CTCAGTCACAATCCAGAGAAGCC            |
|                                      | Rv | ACACTCTTCTCACTCCCTCTAC             |
| mouse GAPDH                          | Fw | TGCACCACCAACTGCTTAG                |
|                                      | Rv | GGCATGGACTGTGGTCATGA               |
| SARS-CoV-2                           | Fw | AGCCTCTTCTCGTTCCTCATCAC            |
|                                      | Rv | CCGCCATTGCCAGCCATTC                |
| mouse VE-cadherin                    | Fw | TACTCAGCCCTGCTCTGGTT               |
|                                      | Rv | GCTTGCAGAGGCTGTGTCTT               |
| mouse CD31                           | Fw | ACGAGCCCAATCACGTTTCAG              |
|                                      | Rv | AAAACGCTTGGGTGTCATTCA              |
| mouse Claudin-5                      | Fw | CTGGACCACAACATCGTGAC               |
|                                      | Rv | AGTGCTACCCGTGCCTTAAC               |
| mouse Occludin                       | Fw | TTGAAAGTCCACCTCCTTACAGA            |
|                                      | Rv | CCGGATAAAAAGAGTACGCTGG             |
| mouse ZO-1                           | Fw | GCCGCTAAGAGCACAGCAA                |

|             |    |                         |
|-------------|----|-------------------------|
|             | Rv | TCCCCACTCTGAAAATGAGGA   |
| mouse JAM-A | Fw | TCTCTTCACGTCTATGATCCTGG |
|             | Rv | TTTGATGGACTCGTTCTCGGG   |
| mouse ESAM  | Fw | TTGCTGCGGGTTTTGTTTCCT   |
|             | Rv | TCTACCGCTTCCAATTTGTTGAG |

---

| <b>Genotyping primers</b>             |    | <b>5'-3'</b>               |
|---------------------------------------|----|----------------------------|
| CAG-stop <sup>flox</sup> -Robo4 mouse | Fw | CCATCAAGCTGATCCGGAAC       |
|                                       | Rv | GTAACAGGAGGGTCCCATCC       |
| CDH5-CreERT2 mouse                    | Fw | GCCTGCATTACCGGTCGATGCAACGA |
|                                       | Rv | GTGGCAGATGGCGCGGCAACACCATT |

---
